# Supplementary material for: PO-containing dibenzopentaarenes: facile synthesis, structures and optoelectronic properties
Source: Royal Society of Chemistry journal article supplement (doi:10.1039/d2dt01889f), 2022-01-01
Supplement: d2dt01889f1.pdf [file d2dt01889f1.pdf]

## Electronic Supplementary Information

*for*

### **P=O-Containing Dibenzopentaarenes: Facile Synthesis, Structures and Optoelectronic Properties**

Liuzhong Yuan,<sup>†</sup> Yujia Liu,<sup>†</sup> Wenting Sun,<sup>†</sup> Kaiqi Ye,<sup>†</sup> Chuandong Dou<sup>\*,†</sup> and Yue Wang<sup>†</sup>

*<sup>†</sup>State Key Laboratory of Supramolecular Structure and Materials, College of Chemistry, Jilin University, Changchun 130012, P. R. China*

E-mail: chuandong@jlu.edu.cn

#### *Contents*

- 1. HRMS spectra and thermal properties**
- 2. X-ray crystallographic analysis**
- 3. Photophysical and electrochemical properties**
- 4. Geometry optimizations and time-dependent DFT calculations**
- 5. Aromaticity**
- 6. <sup>1</sup>H NMR and <sup>13</sup>C NMR spectra**
- 7. Reference**

## 1. HRMS spectra and thermal properties

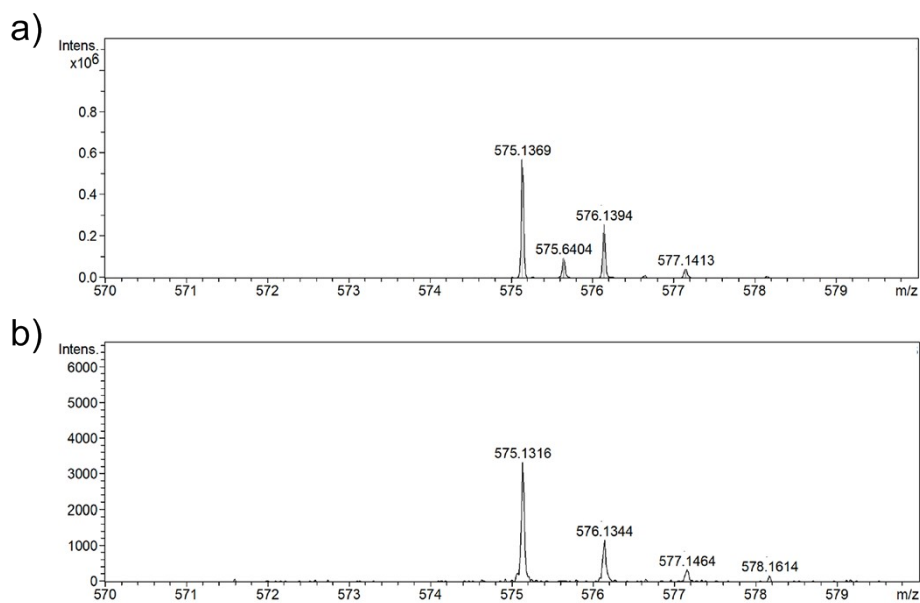

**Fig. S1.** High-resolution mass spectra of a) **5a** and b) **5b**,  $[M+H]^+$  Calcd: 575.1330.

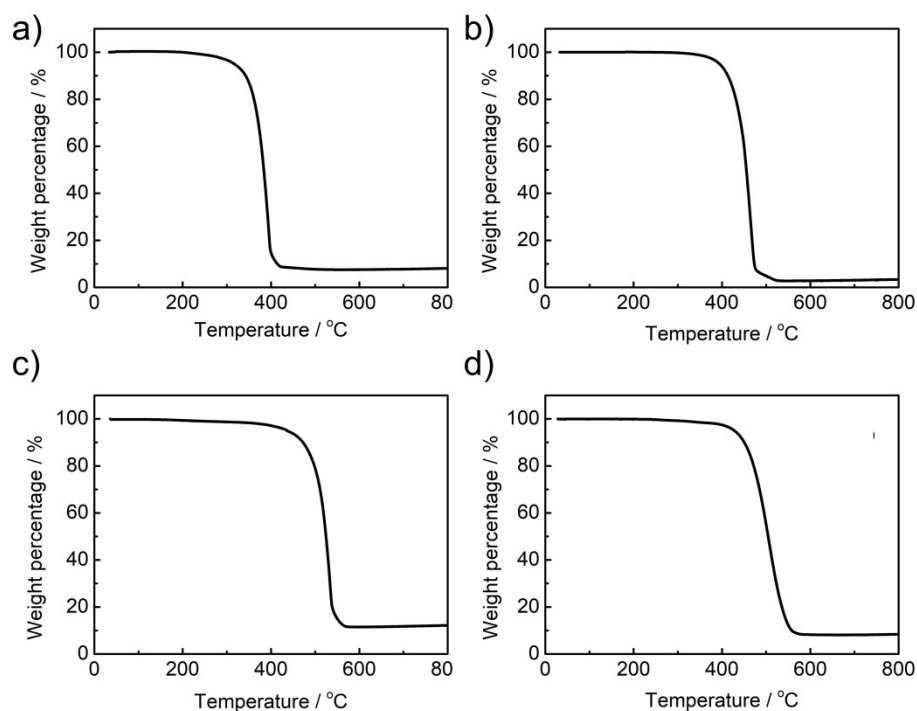

**Fig. S2.** Thermogravimetric analysis (TGA) curves of a) **3**, b) **4**, c) **5a** and d) **5b**. The decomposition temperature ( $T_d$ ) at 5% weight loss is 317 °C for **3**, 394 °C for **4**, 428 °C for **5a** and 436 °C for **5b** under N<sub>2</sub>.

## 2. X-ray crystallographic analysis

Single crystal X-ray diffraction data were collected on a Rigaku RAXIS-PRID diffractometer with graphite monochromator Mo·K $\alpha$  radiation. The structure was solved using the SHELXTL-97 and refined by the full-matrix least-squares on F<sup>2</sup> (SHELXL-97). CCDC 2117851 (**3**), 2124936 (**4**) and 2168346 (**5a**) contain the supplementary crystallographic data for this paper. The data can be obtained free of charge from The Cambridge Crystallographic Data Centre via [www.ccdc.cam.ac.uk/structures/](http://www.ccdc.cam.ac.uk/structures/). The single crystal structure of **4** has been reported in the previous work.<sup>1</sup>

The single crystals of **3** suitable for X-ray diffraction (XRD) analysis were grown by the diffusion of hexane into a solution of **3** in CH<sub>2</sub>Cl<sub>2</sub>. The crystal data of **3** are as follows: C<sub>30</sub>H<sub>26</sub>Si<sub>2</sub>; FW = 442.69, monoclinic, space group *P2<sub>1</sub>/c*, *a* = 10.925(6) Å, *b* = 10.856(7) Å, *c* = 19.250(12) Å,  $\alpha = 90^\circ$ ,  $\beta = 90.827(2)^\circ$ ,  $\gamma = 90^\circ$ , *V* = 2282.9(2) Å<sup>3</sup>, *Z* = 4, *D*<sub>calcd</sub> = 1.288 g cm<sup>-3</sup>, *R*<sub>1</sub> = 0.0515 (*I* > 2 $\sigma$ (*I*)), *wR*<sub>2</sub> = 0.1565 (all data), GOF = 1.092.

The single crystals of **5a** suitable for X-ray diffraction (XRD) analysis were grown by the diffusion of pentane into a solution of **5a** in CH<sub>2</sub>Cl<sub>2</sub>. The crystal data of **5a** are as follows: C<sub>38</sub>H<sub>24</sub>O<sub>2</sub>P<sub>2</sub>; FW = 574.51, monoclinic, space group *P2<sub>1</sub>/c*, *a* = 10.048(5) Å, *b* = 21.103(13) Å, *c* = 15.594(10) Å,  $\alpha = 90^\circ$ ,  $\beta = 101.908(2)^\circ$ ,  $\gamma = 90^\circ$ , *V* = 3235.5(3) Å<sup>3</sup>, *Z* = 4, *D*<sub>calcd</sub> = 1.179 g cm<sup>-3</sup>, *R*<sub>1</sub> = 0.0498 (*I* > 2 $\sigma$ (*I*)), *wR*<sub>2</sub> = 0.1488 (all data), GOF = 1.032.

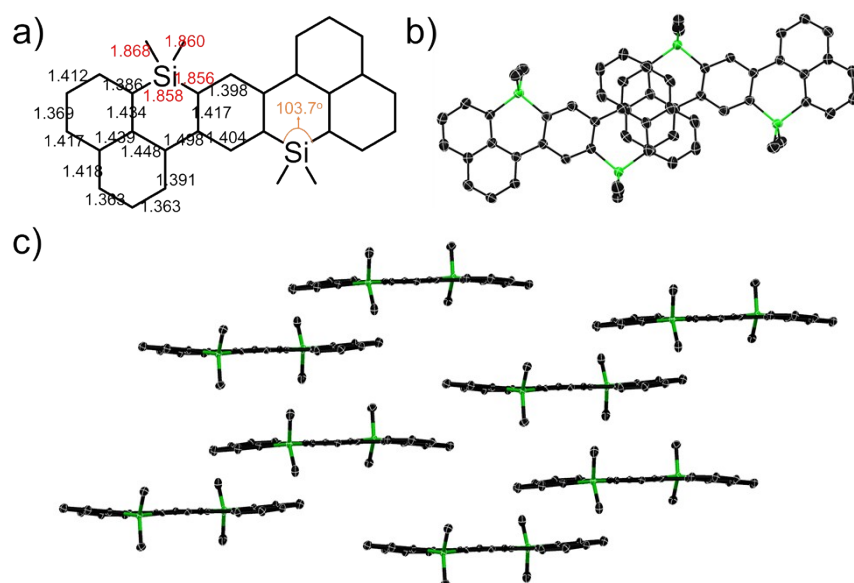

**Fig. S3.** a) X-ray crystal structure of **3**, along with its bond lengths (Å) and bond angles (°) around the Si atoms. b) The  $\pi$ - $\pi$  stacking dimer and c) packing structure of **3**. Hydrogen atoms are not shown for clarity.

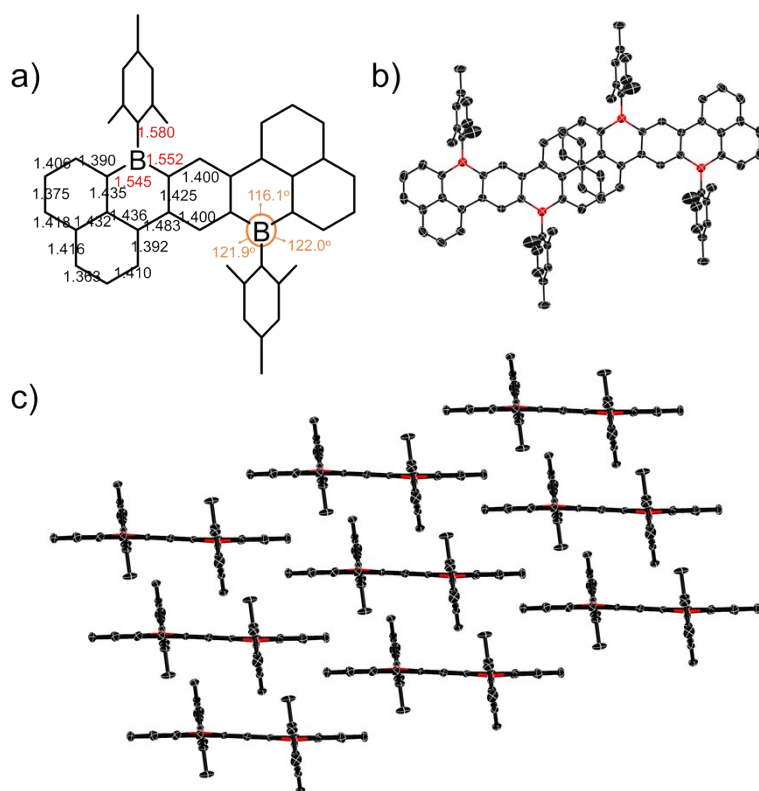

**Fig. S4.** a) X-ray crystal structure of **4**, along with its bond lengths (Å) and bond angles (°) around the B atoms. b) The  $\pi$ - $\pi$  stacking and c) packing structure of **4**. Hydrogen atoms and the solvent molecules are not shown for clarity.

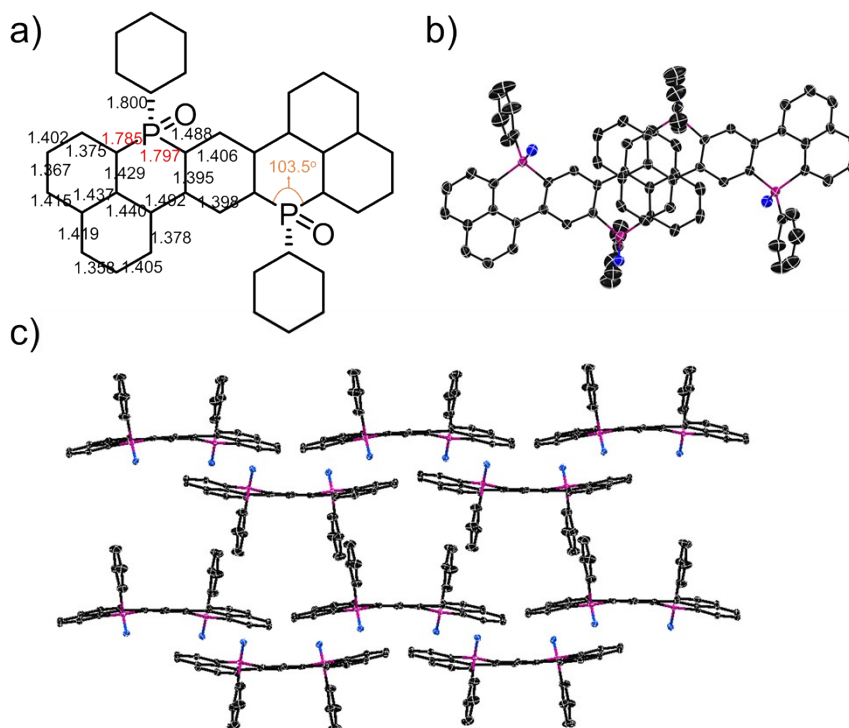

**Fig. S5.** a) X-ray crystal structure of **5a**, along with its bond lengths (Å) and bond angles (°) around the P atoms. b) The  $\pi$ - $\pi$  stacking and c) packing structure of **5a**. Hydrogen atoms and the solvent molecules are not shown for clarity.

### 3. Photophysical and electrochemical properties

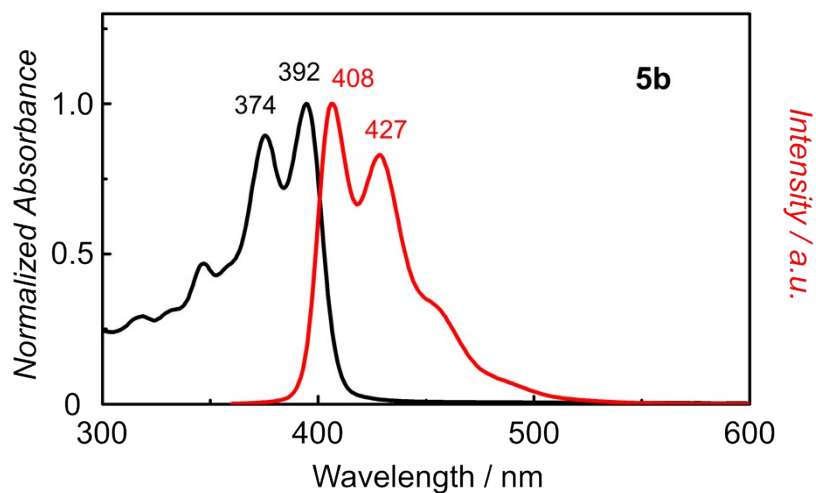

**Fig. S6.** UV-Vis absorption and fluorescence spectra of **5b** in toluene ( $1 \times 10^{-5} \text{ M}^{-1}$ ).

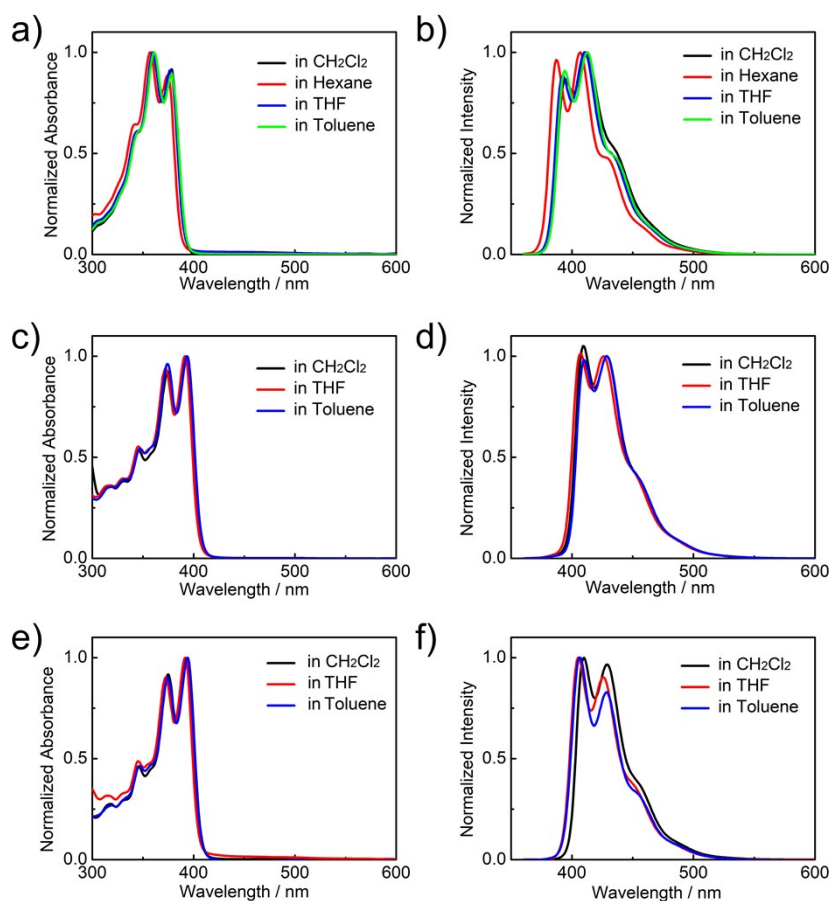

**Fig. S7.** UV-Vis absorption and fluorescence spectra of a,b) **3**, c,d) **5a** and e,f) **5b** in various solvents, respectively.

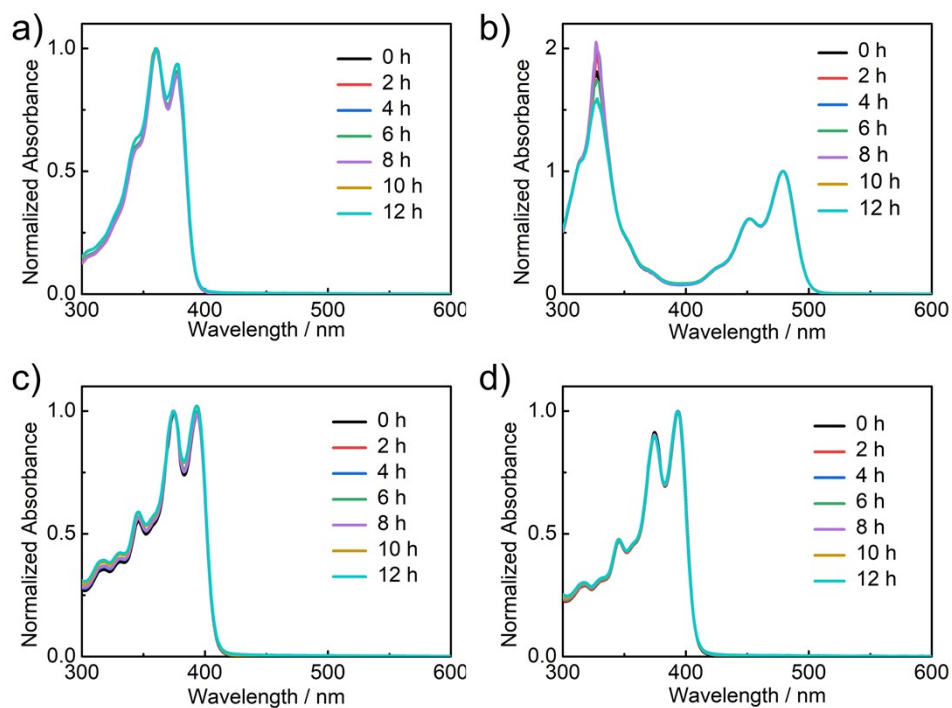

**Fig. S8.** UV-Vis absorption spectra of a) **3**, b) **4**, c) **5a** and d) **5b** in toluene with the solution left at ambient conditions for 12 h.

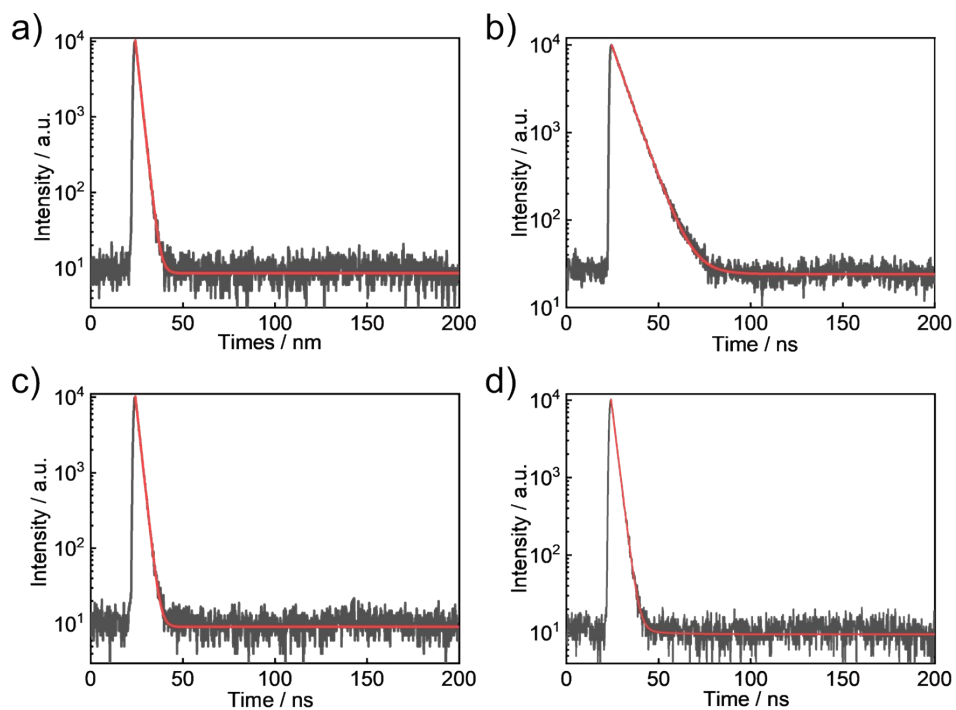

**Fig. S9.** Transient photoluminescence decay spectra of a) **3**, b) **4**, c) **5a** and d) **5b** in toluene.

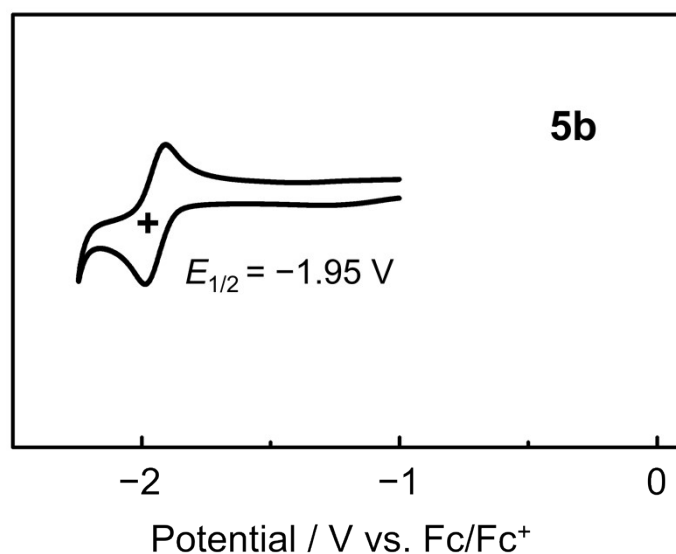

**Fig. S10.** Cyclic voltammogram of **5b** in CH<sub>2</sub>Cl<sub>2</sub> (1.0 mM). Fc/Fc<sup>+</sup> = ferrocene/ferrocenium.

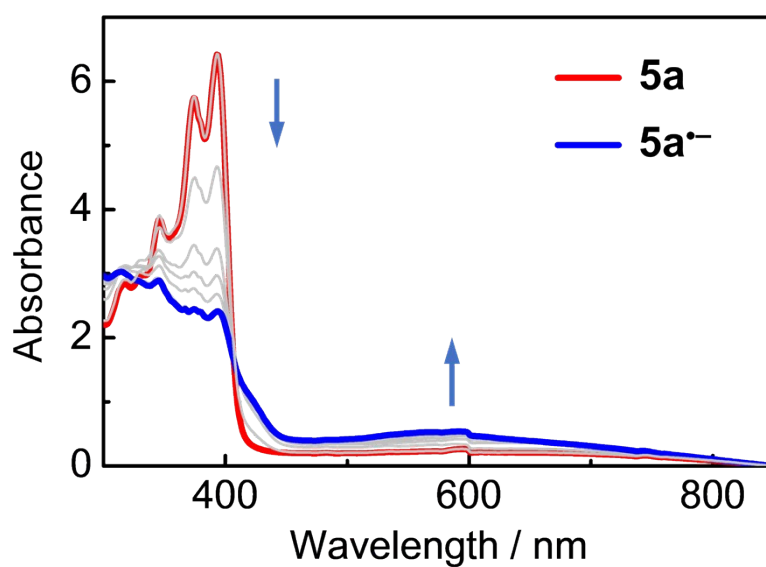

**Fig. S11.** UV-Vis absorption spectra of **5a** in CH<sub>2</sub>Cl<sub>2</sub> (0.10 mM) measured in situ during cyclic voltammetry.

Upon applying a voltage of  $-2.90 \text{ V}$ , the one-electron reduction occurs with the absorption spectrum gradually changing. A long-wavelength absorption band around  $600 \text{ nm}$  is observed, suggesting the formation of radical anion species **5a<sup>•-</sup>**.



#### 4. Geometry optimizations and time-dependent DFT calculations

All calculations were carried out using the Gaussian 09 program.<sup>2</sup> Density functional theory (DFT) calculations were performed on **3**, **4**, **5a** and **5b**, as well as **1a** and **2a** at the B3LYP/6-311G(d) level of theory to obtain the optimized structures and molecular orbitals. Time-dependent DFT (TD-DFT) calculations were performed on them at the same level of theory to assign the absorption bands observed in the UV-Vis absorption spectra.

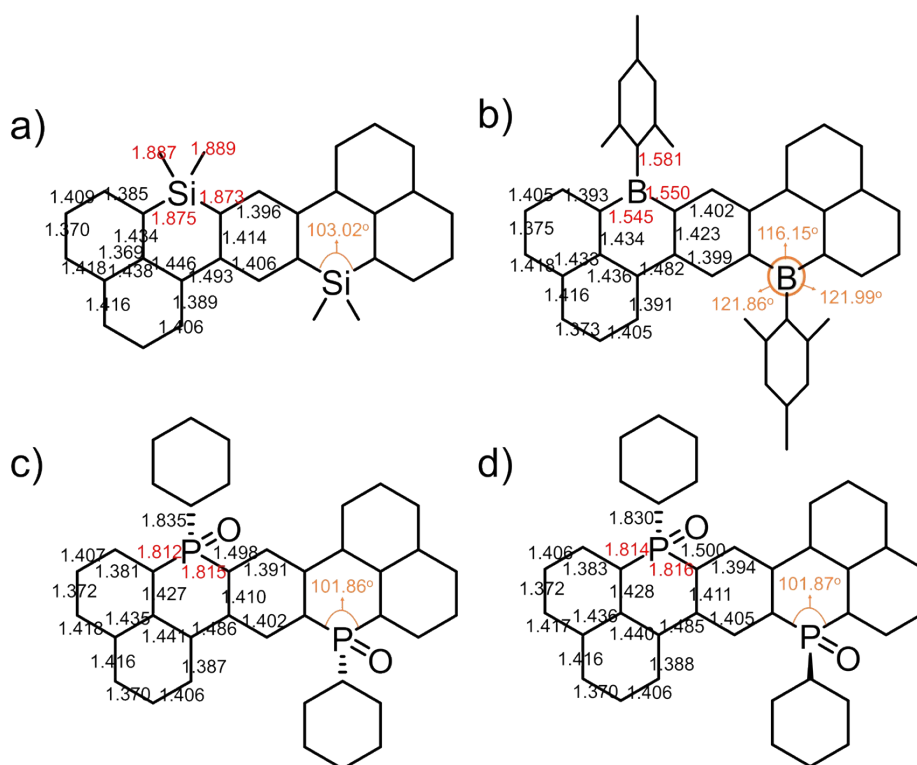

**Fig. S12.** Optimized structure of a) **3**, b) **4**, c) **5a** and d) **5b**, along with their bond lengths (Å) and bond angles (°) around the heteroatoms.

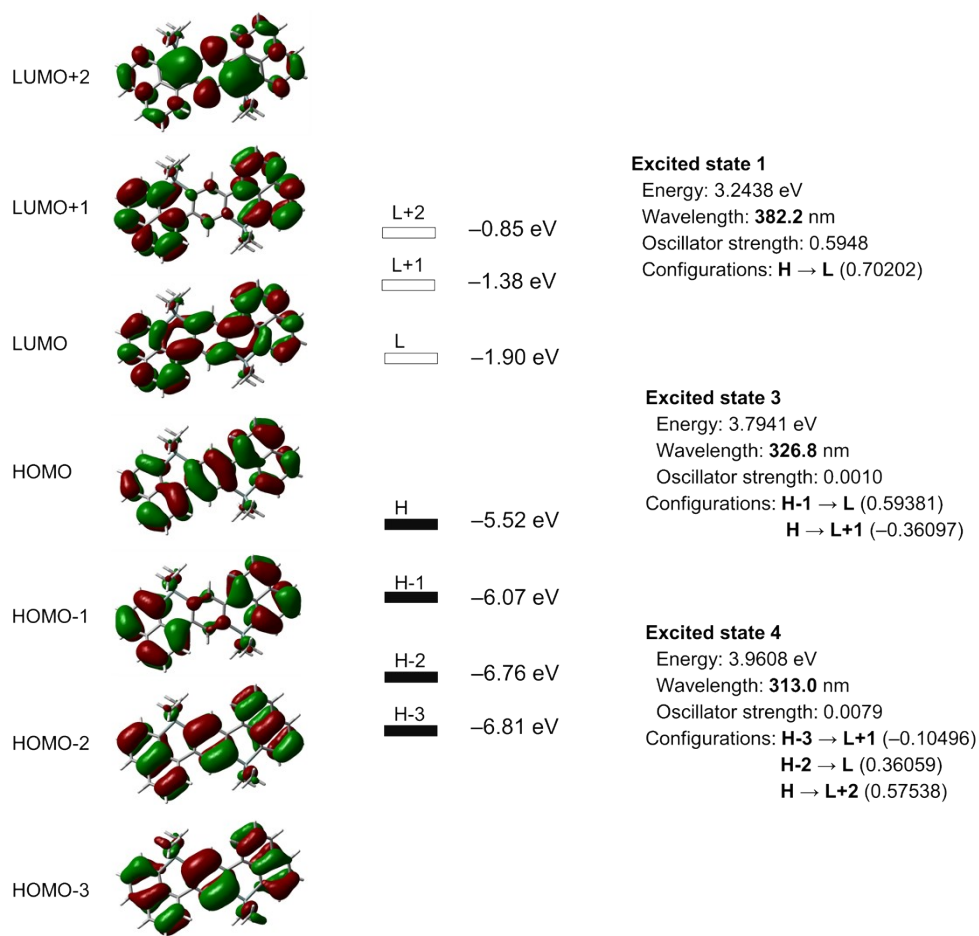

**Fig. S13.** The molecular orbitals, energy levels, excitation energies and oscillator strengths of **3**, based on the TD-DFT (B3LYP/6-311G(d)) calculation.

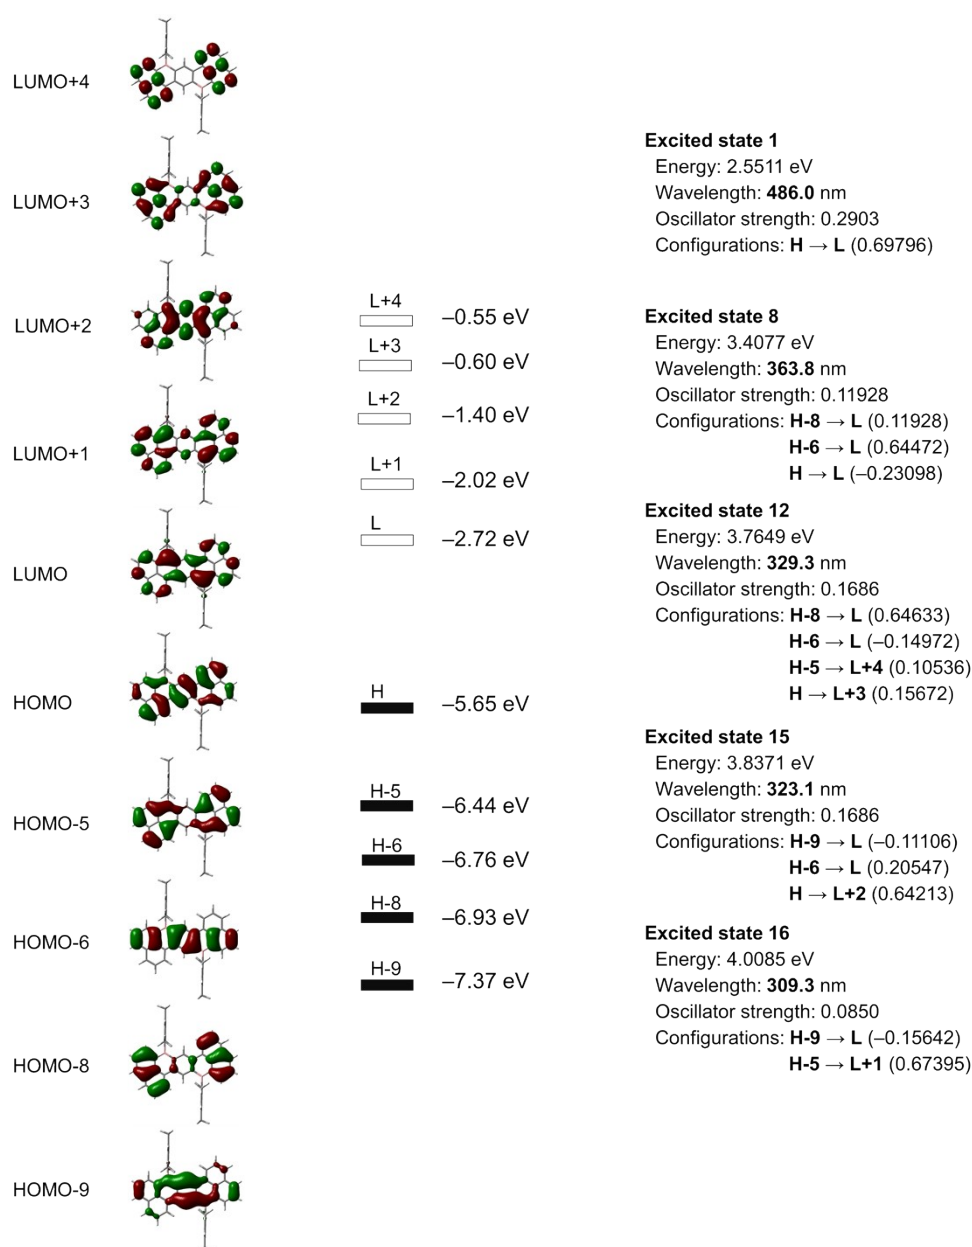

**Fig. S14.** The molecular orbitals, energy levels, excitation energies and oscillator strengths of **4**, based on the TD-DFT (B3LYP/6-311G(d)) calculation.

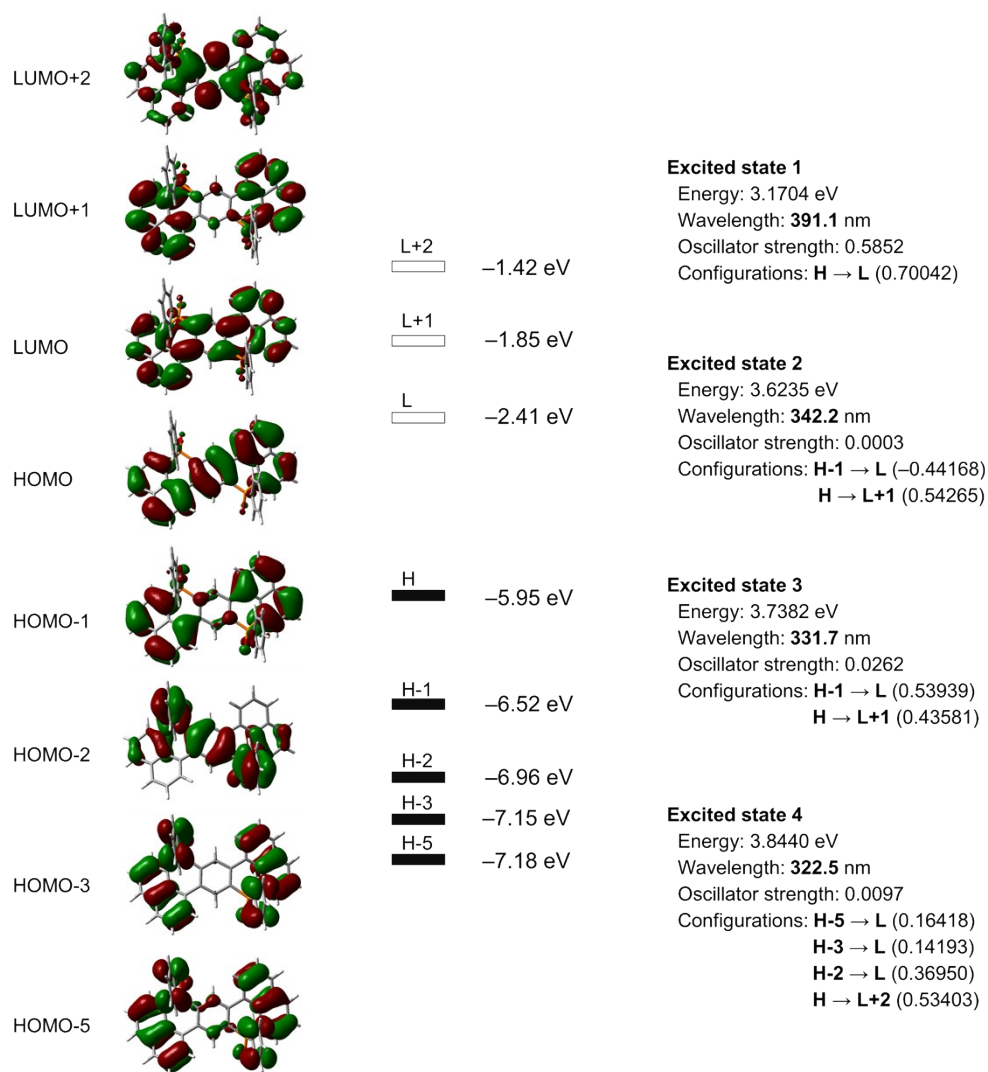

**Fig. S15.** The molecular orbitals, energy levels, excitation energies and oscillator strengths of **5a**, based on the TD-DFT (B3LYP/6-311G(d)) calculation.

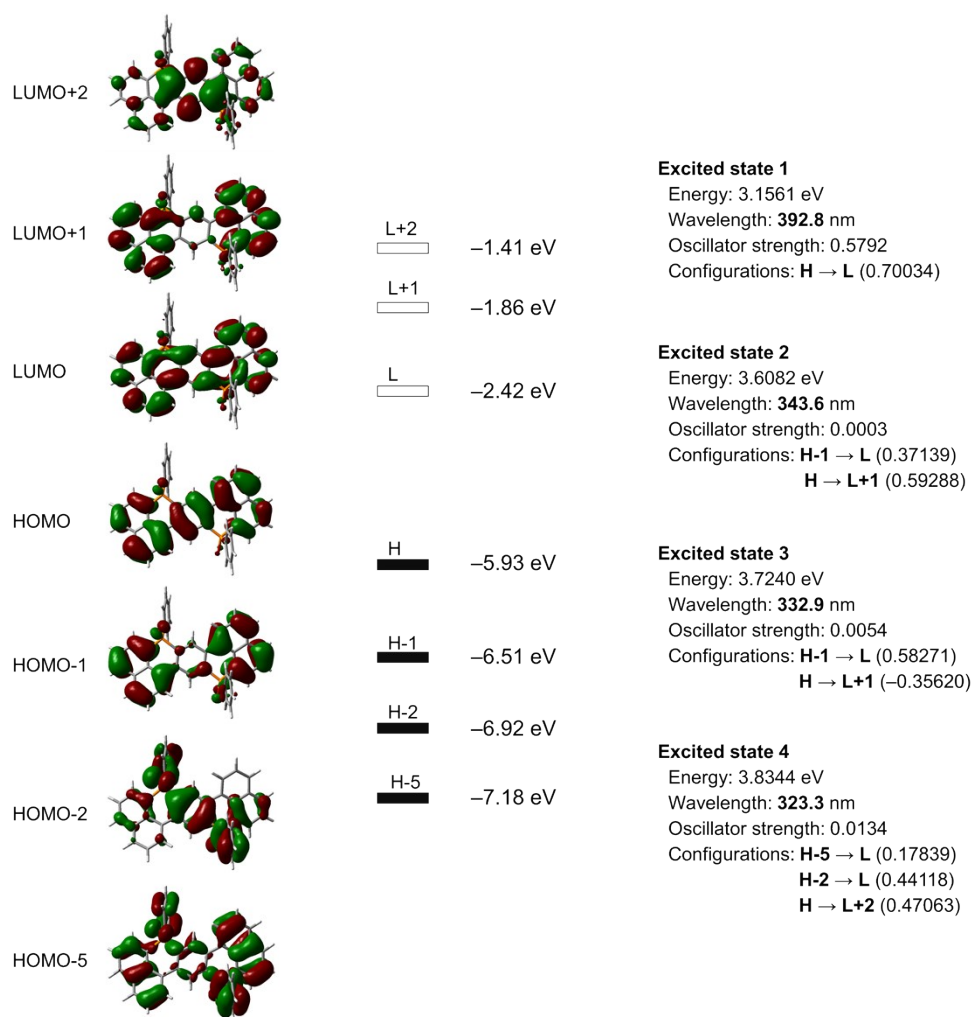

**Fig. S16.** The molecular orbitals, energy levels, excitation energies and oscillator strengths of **5b**, based on the TD-DFT (B3LYP/6-311G(d)) calculation.

**Table S1.** Coordinates of the optimized structure for **3** at the B3LYP/6-311G(d) level.

| Atom | x         | y         | z         |
|------|-----------|-----------|-----------|
| Si   | -2.528975 | 2.07214   | -0.003310 |
| Si   | 2.528783  | -2.072097 | -0.003973 |
| C    | -3.911145 | -0.451341 | -0.074534 |
| C    | -3.967593 | 0.941171  | -0.412684 |
| C    | -5.150934 | 1.477301  | -0.893022 |
| H    | -5.198312 | 2.533181  | -1.148565 |
| C    | -6.318168 | 0.70329   | -1.045961 |
| H    | -7.223954 | 1.155442  | -1.437621 |
| C    | -6.305321 | -0.612383 | -0.661001 |
| H    | -7.205941 | -1.21574  | -0.730720 |
| C    | -5.126659 | -1.215839 | -0.152592 |
| C    | -5.158054 | -2.559485 | 0.295800  |
| H    | -6.091656 | -3.111306 | 0.239192  |
| C    | -4.030795 | -3.135286 | 0.819256  |
| H    | -4.055794 | -4.149434 | 1.204930  |
| C    | -2.821013 | -2.418408 | 0.839690  |
| H    | -1.951015 | -2.911587 | 1.254591  |
| C    | -2.704114 | -1.120167 | 0.359175  |
| C    | -1.342149 | -0.513325 | 0.282104  |
| C    | -0.212954 | -1.347939 | 0.215427  |
| H    | -0.365904 | -2.417692 | 0.120886  |
| C    | 1.101955  | -0.878127 | 0.213384  |
| C    | 3.967827  | -0.941255 | -0.412065 |
| C    | 5.151393  | -1.477697 | -0.891536 |
| H    | 5.1988    | -2.533693 | -1.146614 |
| C    | 6.318756  | -0.70386  | -1.044236 |
| H    | 7.224717  | -1.156252 | -1.435218 |
| C    | 6.305773  | 0.612015  | -0.659967 |
| H    | 7.20644   | 1.215307  | -0.729610 |
| C    | 5.126917  | 1.215768  | -0.152381 |
| C    | 5.158234  | 2.559632  | 0.295360  |

|   |           |           |           |
|---|-----------|-----------|-----------|
| H | 6.091886  | 3.111372  | 0.238793  |
| C | 4.030827  | 3.135744  | 0.818126  |
| H | 4.055736  | 4.150085  | 1.203300  |
| C | 2.821023  | 2.418903  | 0.838571  |
| H | 1.950956  | 2.912324  | 1.253028  |
| C | 2.704185  | 1.120415  | 0.358689  |
| C | 3.911316  | 0.451372  | -0.074443 |
| C | 1.342204  | 0.513549  | 0.281747  |
| C | 0.212975  | 1.348153  | 0.215081  |
| H | 0.365874  | 2.417887  | 0.120284  |
| C | -1.101923 | 0.878342  | 0.213462  |
| C | -2.179136 | 3.298287  | -1.395419 |
| H | -1.953959 | 2.784242  | -2.333169 |
| H | -1.328396 | 3.944983  | -1.159680 |
| H | -3.036189 | 3.95515   | -1.574256 |
| C | -2.888482 | 3.027832  | 1.587052  |
| H | -3.101015 | 2.350338  | 2.418286  |
| H | -2.037552 | 3.651865  | 1.878692  |
| H | -3.754443 | 3.686834  | 1.468727  |
| C | 2.887218  | -3.029519 | 1.585593  |
| H | 3.098628  | -2.352905 | 2.417840  |
| H | 3.753557  | -3.688063 | 1.467435  |
| H | 2.036225  | -3.654203 | 1.875636  |
| C | 2.1789    | -3.296965 | -1.397216 |
| H | 3.035334  | -3.954767 | -1.575579 |
| H | 1.955084  | -2.782251 | -2.334908 |
| H | 1.32719   | -3.942782 | -1.162482 |

**Table S2.** Coordinates of the optimized structure for **4** at the B3LYP/6-311G(d) level.

| Atom | x         | y         | z         |
|------|-----------|-----------|-----------|
| B    | -2.904589 | 0.590389  | 0.000038  |
| C    | -3.309212 | 2.081619  | 0.000039  |
| C    | -4.648301 | 2.465562  | 0.000062  |
| H    | -5.410853 | 1.692806  | 0.000082  |
| C    | -5.040169 | 3.814967  | 0.000058  |
| H    | -6.093154 | 4.077772  | 0.000087  |
| C    | -4.077687 | 4.797339  | 0.000024  |
| H    | -4.36456  | 5.845346  | 0.000018  |
| C    | -2.697171 | 4.474834  | -0.000005 |
| C    | -1.719488 | 5.499045  | -0.000049 |
| H    | -2.038956 | 6.536942  | -0.000065 |
| C    | -0.386236 | 5.173174  | -0.000077 |
| H    | 0.37095   | 5.950398  | -0.000116 |
| C    | 0.012433  | 3.82558   | -0.000055 |
| H    | 1.075361  | 3.622033  | -0.000079 |
| C    | -0.899348 | 2.775113  | -0.000007 |
| C    | -2.298241 | 3.098788  | 0.000011  |
| C    | -0.443963 | 1.365235  | 0.000015  |
| C    | -1.382482 | 0.295364  | 0.000016  |
| C    | -0.913719 | -1.025958 | 0.000022  |
| H    | -1.670809 | -1.80012  | 0.000014  |
| C    | -3.979287 | -0.568973 | 0.000004  |
| C    | -4.465174 | -1.102243 | 1.213331  |
| C    | -5.406796 | -2.133941 | 1.194600  |
| H    | -5.767644 | -2.535085 | 2.139202  |
| C    | -5.894355 | -2.664071 | -0.000085 |
| C    | -5.406633 | -2.13398  | -1.194733 |
| H    | -5.767362 | -2.535172 | -2.139359 |
| C    | -4.465021 | -1.102289 | -1.213382 |
| C    | -3.971252 | -0.568157 | 2.540782  |
| H    | -2.885614 | -0.668829 | 2.639675  |
| H    | -4.427994 | -1.098228 | 3.379383  |
| H    | -4.201018 | 0.495648  | 2.659408  |



|   |           |           |           |
|---|-----------|-----------|-----------|
| C | -6.936693 | -3.756451 | -0.000131 |
| H | -6.85121  | -4.394859 | 0.882914  |
| H | -6.851645 | -4.394363 | -0.883574 |
| H | -7.950163 | -3.339362 | 0.000242  |
| C | -3.970939 | -0.568212 | -2.540774 |
| H | -4.200901 | 0.49554   | -2.659523 |
| H | -4.42741  | -1.098434 | -3.379424 |
| H | -2.885262 | -0.668665 | -2.639448 |
| B | 2.90459   | -0.590389 | 0.000027  |
| C | 3.309212  | -2.081619 | -0.000007 |
| C | 4.648301  | -2.465563 | -0.000047 |
| H | 5.410853  | -1.692807 | -0.000061 |
| C | 5.040169  | -3.814967 | -0.000064 |
| H | 6.093154  | -4.077773 | -0.000106 |
| C | 4.077687  | -4.797339 | -0.000031 |
| H | 4.36456   | -5.845347 | -0.000040 |
| C | 2.697171  | -4.474834 | 0.000015  |
| C | 1.719488  | -5.499045 | 0.000059  |
| H | 2.038956  | -6.536943 | 0.000062  |
| C | 0.386236  | -5.173175 | 0.000103  |
| H | -0.37095  | -5.950399 | 0.000142  |
| C | -0.012432 | -3.825581 | 0.000097  |
| H | -1.075361 | -3.622033 | 0.000132  |
| C | 0.899349  | -2.775113 | 0.000052  |
| C | 2.298242  | -3.098788 | 0.000018  |
| C | 0.443963  | -1.365235 | 0.000039  |
| C | 1.382483  | -0.295364 | 0.000040  |
| C | 0.913719  | 1.025958  | 0.000031  |
| H | 1.670809  | 1.800121  | 0.000039  |
| C | 3.979287  | 0.568973  | 0.000005  |
| C | 4.465093  | 1.102263  | -1.213346 |
| C | 5.406715  | 2.133961  | -1.194661 |
| H | 5.767498  | 2.535122  | -2.139281 |
| C | 5.894354  | 2.664073  | -0.000001 |
| C | 5.406713  | 2.133961  | 1.194672  |

|   |          |           |           |
|---|----------|-----------|-----------|
| H | 5.767506 | 2.535137  | 2.139279  |
| C | 4.465102 | 1.10227   | 1.213368  |
| C | 3.971077 | 0.568202  | -2.540772 |
| H | 2.885432 | 0.668878  | -2.639587 |
| H | 4.42776  | 1.098288  | -3.379395 |
| H | 4.200833 | -0.4956   | -2.659435 |
| C | 6.936691 | 3.756453  | -0.000007 |
| H | 6.851144 | 4.394879  | -0.883033 |
| H | 6.851707 | 4.394347  | 0.883455  |
| H | 7.950161 | 3.339364  | -0.000462 |
| C | 3.971115 | 0.568168  | 2.540784  |
| H | 4.201087 | -0.495586 | 2.659497  |
| H | 4.427645 | 1.098374  | 3.379412  |
| H | 2.885445 | 0.668618  | 2.639538  |

**Table S3.** Coordinates of the optimized structure for **5a** at the B3LYP/6-311G(d) level.

| Atom | x         | y         | z         |
|------|-----------|-----------|-----------|
| P    | 2.856258  | -1.436036 | -0.559075 |
| P    | -2.856142 | 1.436374  | -0.558545 |
| O    | -2.869302 | 2.725366  | -1.322529 |
| O    | 2.869412  | -2.724621 | -1.323739 |
| C    | 4.025863  | -2.27996  | 3.837575  |
| H    | 4.302826  | -2.498211 | 4.864152  |
| C    | 3.689577  | -0.977268 | 3.468843  |
| H    | 3.704022  | -0.181706 | 4.206924  |
| C    | 3.334249  | -0.693722 | 2.153699  |
| H    | 3.075316  | 0.323766  | 1.879904  |
| C    | 3.313122  | -1.715063 | 1.1963    |
| C    | 1.261243  | -0.569546 | -0.529189 |
| C    | 1.174317  | 0.838582  | -0.531928 |
| C    | -0.12338  | 1.370645  | -0.55845  |
| H    | -0.276612 | 2.438281  | -0.654319 |
| C    | -1.261086 | 0.569956  | -0.528924 |
| C    | -3.313344 | 1.714425  | 1.196899  |
| C    | -3.333696 | 0.692775  | 2.153983  |
| H    | -3.073825 | -0.324399 | 1.879916  |
| C    | -3.689427 | 0.975611  | 3.469172  |
| H    | -3.703259 | 0.179812  | 4.207009  |
| C    | -4.02689  | 2.277896  | 3.838264  |
| H    | -4.304158 | 2.495591  | 4.864877  |
| C    | 4.005382  | -3.299131 | 2.888674  |
| H    | 4.266204  | -4.313583 | 3.17321   |
| C    | 3.649603  | -3.019904 | 1.57023   |
| H    | 3.626992  | -3.803511 | 0.821039  |
| C    | 0.123534  | -1.370224 | -0.55891  |
| H    | 0.276718  | -2.437837 | -0.655165 |
| C    | -1.174156 | -0.838163 | -0.532133 |

|   |           |           |           |
|---|-----------|-----------|-----------|
| C | -2.363432 | -1.726569 | -0.599231 |
| C | -3.658034 | -1.241846 | -1.006286 |
| C | -4.699731 | -2.189257 | -1.282991 |
| C | -5.943967 | -1.733996 | -1.78916  |
| H | -6.712616 | -2.469611 | -2.006768 |
| C | -6.181917 | -0.39902  | -2.002418 |
| H | -7.132726 | -0.065426 | -2.404169 |
| C | -5.193772 | 0.544582  | -1.664157 |
| H | -5.389755 | 1.60429   | -1.79125  |
| C | -3.971898 | 0.141776  | -1.161353 |
| C | 2.363602  | 1.727007  | -0.598772 |
| C | 3.658286  | 1.242372  | -1.005698 |
| C | 4.700051  | 2.189844  | -1.281969 |
| C | 4.481776  | 3.56831   | -1.038161 |
| H | 5.284979  | 4.271161  | -1.236847 |
| C | 3.277984  | 3.999324  | -0.543474 |
| H | 3.114197  | 5.049965  | -0.328793 |
| C | 2.229087  | 3.084083  | -0.340938 |
| H | 1.284994  | 3.471676  | 0.019995  |
| C | 5.94442   | 1.734705  | -1.78791  |
| H | 6.713109  | 2.470378  | -2.005175 |
| C | 6.18245   | 0.399775  | -2.001369 |
| H | 7.133375  | 0.066271  | -2.402923 |
| C | 5.194215  | -0.543895 | -1.663591 |
| H | 5.390226  | -1.603571 | -1.790902 |
| C | 3.972198  | -0.141206 | -1.16102  |
| C | -3.650982 | 3.018865  | 1.571196  |
| H | -3.628885 | 3.802737  | 0.822268  |
| C | -4.007163 | 3.297378  | 2.889681  |
| H | -4.268873 | 4.311522  | 3.174501  |
| C | -4.481507 | -3.567766 | -1.039389 |
| H | -5.284659 | -4.270584 | -1.238395 |
| C | -3.277824 | -3.99888  | -0.544509 |

|   |           |           |           |
|---|-----------|-----------|-----------|
| H | -3.114103 | -5.049561 | -0.329976 |
| C | -2.228955 | -3.083689 | -0.341606 |
| H | -1.284913 | -3.47132  | 0.019431  |

**Table S4.** Coordinates of the optimized structure for **5b** at the B3LYP/6-311G(d) level.

| Atom | x         | y         | z         |
|------|-----------|-----------|-----------|
| C    | 3.303053  | 1.680718  | -0.37123  |
| C    | 3.695629  | 0.553219  | -1.153247 |
| C    | 4.821766  | 0.597601  | -1.951855 |
| H    | 5.079557  | -0.269502 | -2.551217 |
| C    | 5.637447  | 1.744414  | -1.987294 |
| H    | 6.51348   | 1.764591  | -2.626777 |
| C    | 5.335371  | 2.815461  | -1.183567 |
| H    | 5.980494  | 3.688918  | -1.16836  |
| C    | 4.184105  | 2.813167  | -0.355132 |
| C    | 3.903917  | 3.911299  | 0.495235  |
| H    | 4.589206  | 4.75321   | 0.510024  |
| C    | 2.793502  | 3.895718  | 1.299488  |
| H    | 2.591551  | 4.718899  | 1.976573  |
| C    | 1.886753  | 2.822118  | 1.231451  |
| H    | 1.008671  | 2.861103  | 1.863867  |
| C    | 2.07977   | 1.73762   | 0.387299  |
| C    | 1.008719  | 0.720492  | 0.229761  |
| C    | -0.313086 | 1.006646  | 0.594868  |
| H    | -0.559827 | 1.989344  | 0.977133  |
| C    | -1.354811 | 0.091974  | 0.447345  |
| C    | -4.084656 | -0.606572 | 0.255157  |
| C    | -5.441644 | -0.338086 | 0.270967  |
| H    | -5.790807 | 0.633692  | 0.605426  |
| C    | -6.382362 | -1.307781 | -0.118434 |
| H    | -7.440809 | -1.070712 | -0.106183 |
| C    | -5.94953  | -2.558419 | -0.482043 |
| H    | -6.664698 | -3.328913 | -0.754312 |
| C    | -4.56973  | -2.881351 | -0.50629  |
| C    | -4.149032 | -4.188833 | -0.851389 |
| H    | -4.898651 | -4.934934 | -1.096309 |

|   |           |           |           |
|---|-----------|-----------|-----------|
| C | -2.815423 | -4.504445 | -0.855762 |
| H | -2.486633 | -5.511201 | -1.090344 |
| C | -1.856563 | -3.516174 | -0.573199 |
| H | -0.815406 | -3.809667 | -0.595168 |
| C | -2.198394 | -2.204812 | -0.270919 |
| C | -3.597228 | -1.880128 | -0.167581 |
| C | -1.129081 | -1.18942  | -0.098977 |
| C | 0.180669  | -1.446462 | -0.536526 |
| H | 0.409549  | -2.361652 | -1.067473 |
| C | 1.221176  | -0.541136 | -0.365355 |
| C | 3.68035   | -1.934965 | 0.355669  |
| C | 4.231067  | -3.185915 | 0.059783  |
| C | 3.781741  | -1.423461 | 1.654974  |
| C | 4.879459  | -3.916213 | 1.054194  |
| H | 4.14077   | -3.57503  | -0.948321 |
| C | 4.429282  | -2.156582 | 2.64457   |
| H | 3.356015  | -0.456413 | 1.901769  |
| C | 4.979326  | -3.40305  | 2.345044  |
| H | 5.304633  | -4.886896 | 0.819523  |
| H | 4.502721  | -1.756659 | 3.650741  |
| H | 5.482789  | -3.973188 | 3.119378  |
| C | -3.337731 | 2.214302  | 0.228444  |
| C | -3.677636 | 3.298748  | 1.042681  |
| C | -3.276632 | 2.381596  | -1.160321 |
| C | -3.954378 | 4.540468  | 0.471593  |
| H | -3.722676 | 3.154177  | 2.116746  |
| C | -3.551507 | 3.622192  | -1.726287 |
| H | -3.0139   | 1.544919  | -1.800226 |
| C | -3.890979 | 4.702366  | -0.910187 |
| H | -4.219572 | 5.379664  | 1.10669   |
| H | -3.501276 | 3.74821   | -2.802977 |
| H | -4.105795 | 5.66927   | -1.354149 |
| O | 2.806672  | -1.877012 | -2.253163 |

|   |           |           |           |
|---|-----------|-----------|-----------|
| O | -3.122859 | 0.713648  | 2.53008   |
| P | 2.843546  | -1.041284 | -1.009818 |
| P | -2.991952 | 0.610469  | 1.03922   |



## 5. Aromaticity

Theoretical calculations were performed on **3**, **4**, **5a** and **5b** to investigate their aromaticity. Nucleus-independent chemical shift (NICS) and anisotropy of the induced current density (ACID) were employed to study the aromaticity. The NICS(1)<sub>ZZ</sub> calculations were performed with the nmr=GIAO key word based on the B3LYP/6-311+G(d) level of theory. The ACID calculations were performed with the nmr=CSGT iop(10/93=2) key word based on the B3LYP/6-311G(d) level of theory.

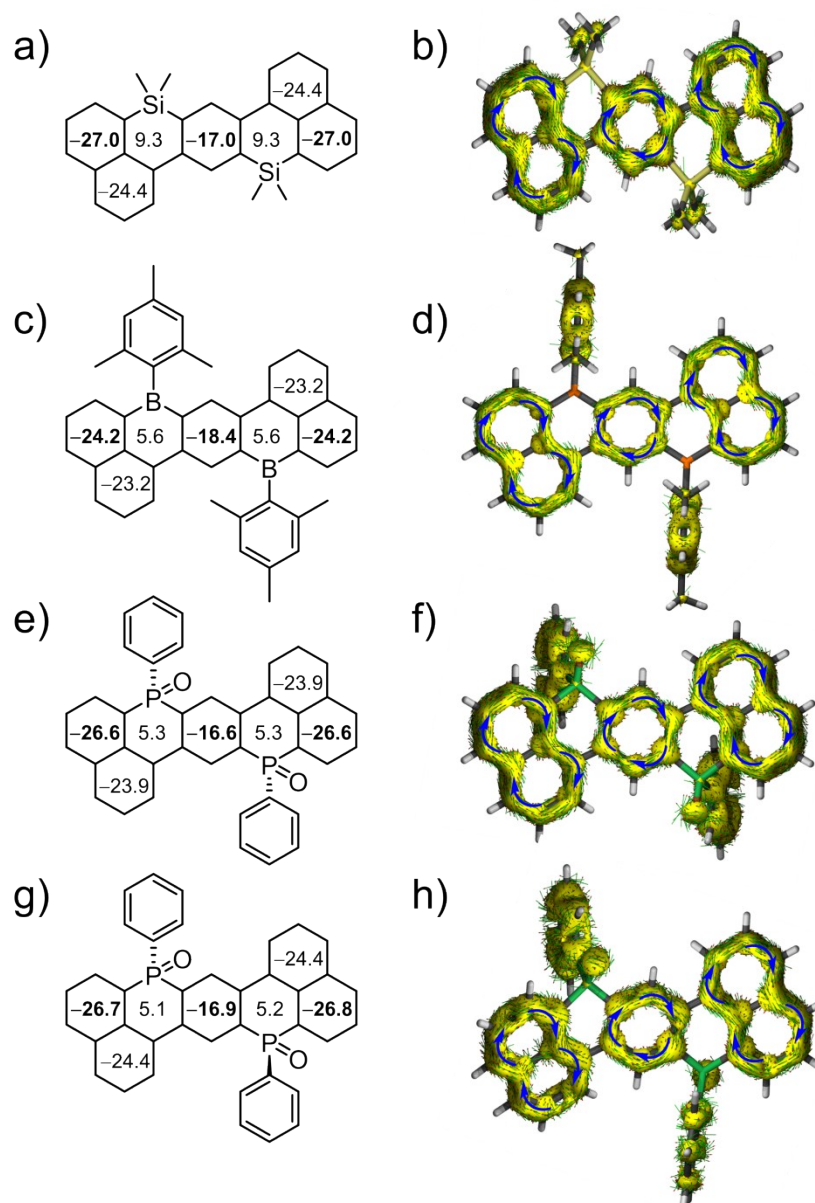

**Fig. S17.** NICS(1)<sub>ZZ</sub> values and ACID plots of a,b) **3**, c,d) **4**, e,f) **5a** and g,h) **5b** (contribution from  $\pi$  electrons only).

## 6. $^1\text{H}$ NMR and $^{13}\text{C}$ NMR spectra

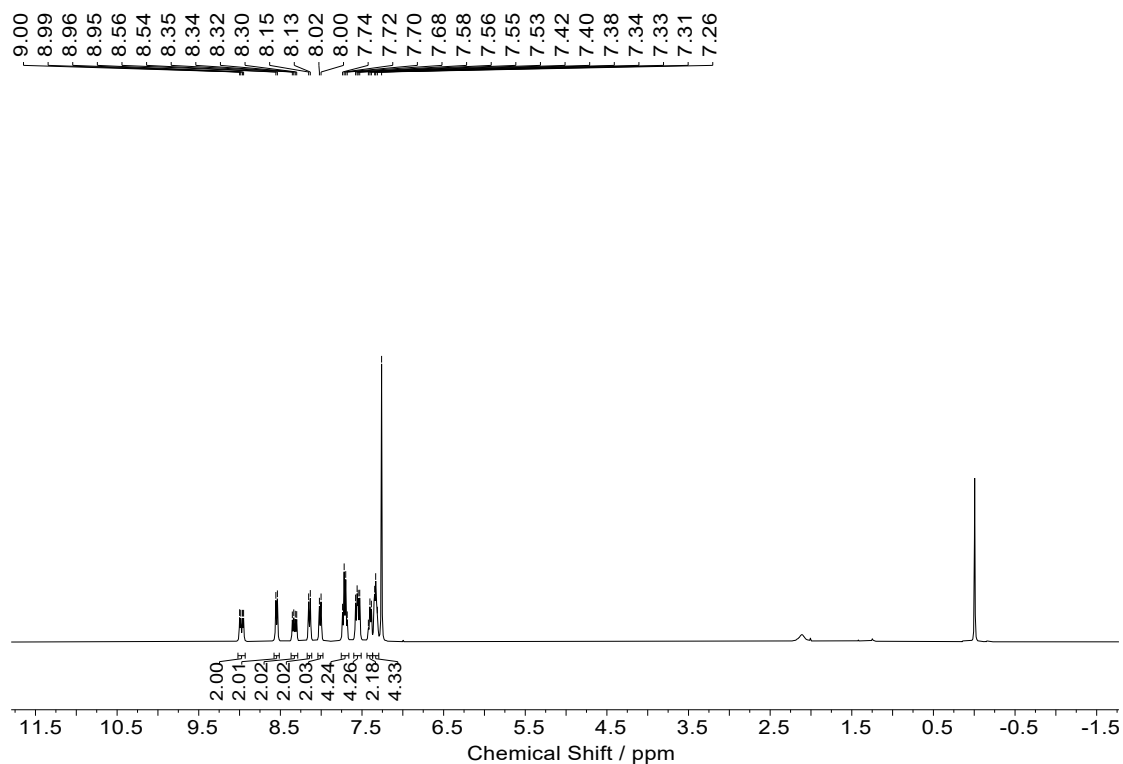

**Fig. S18.**  $^1\text{H}$  NMR spectrum of **5a** in  $\text{CDCl}_3$ .

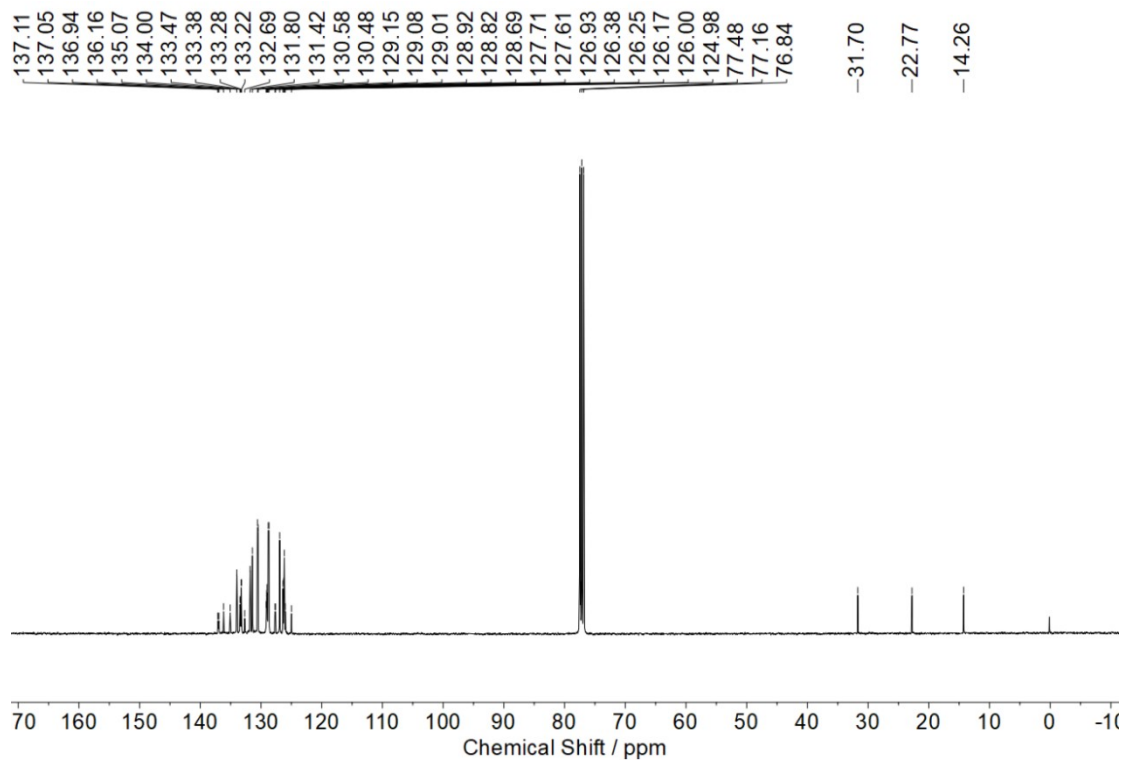

**Fig. S19.**  $^{13}\text{C}$  NMR spectrum of **5a** in  $\text{CDCl}_3$ .

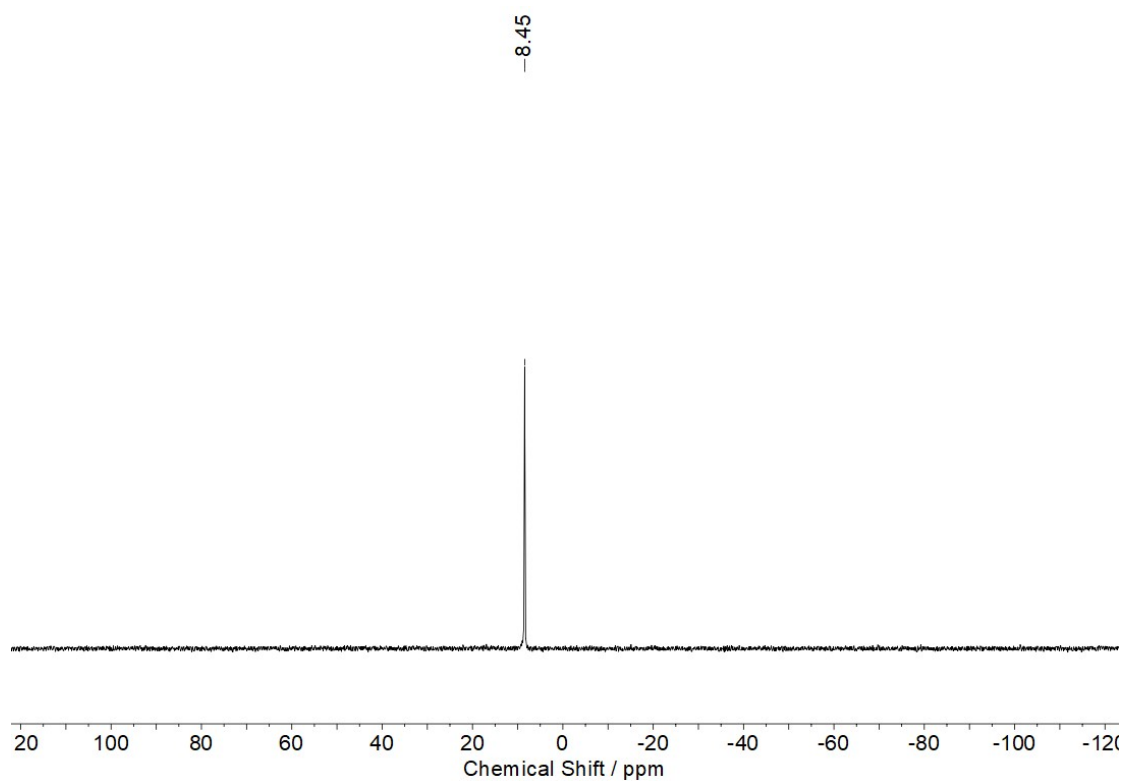

**Fig. S20.**  $^{31}\text{P}$  NMR spectrum of **5a** in  $\text{CDCl}_3$ .

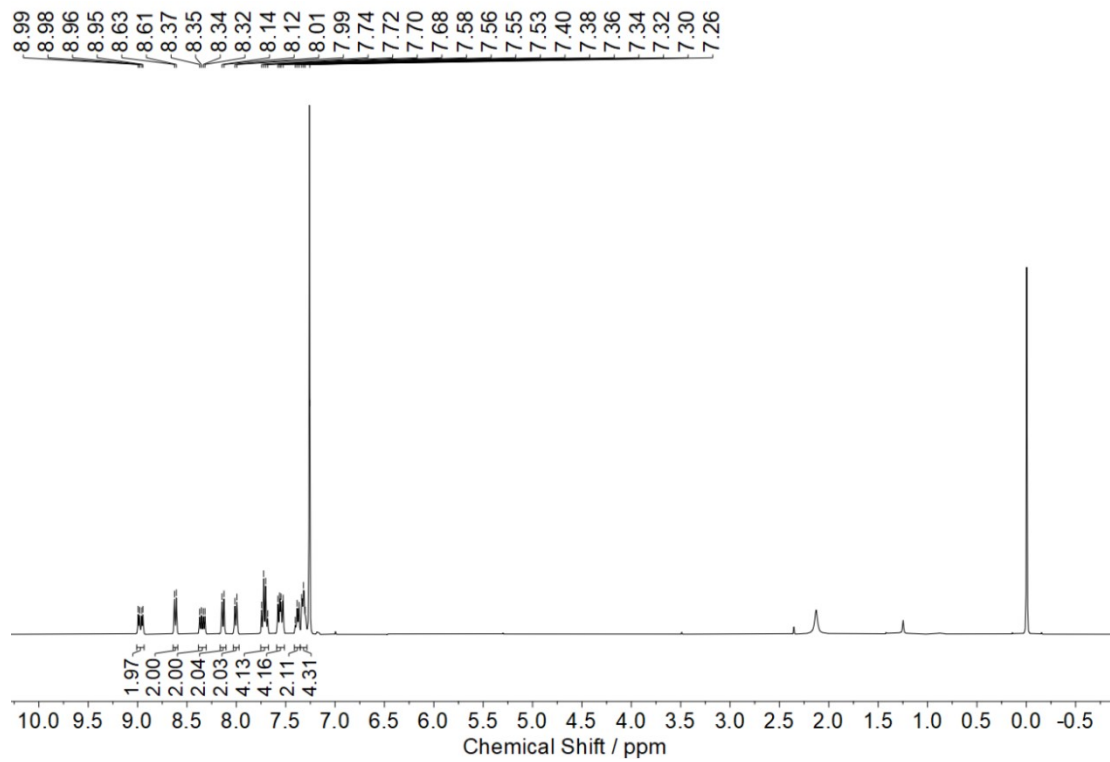

**Fig. S21.**  $^1\text{H}$  NMR spectrum of **5b** in  $\text{CDCl}_3$ .

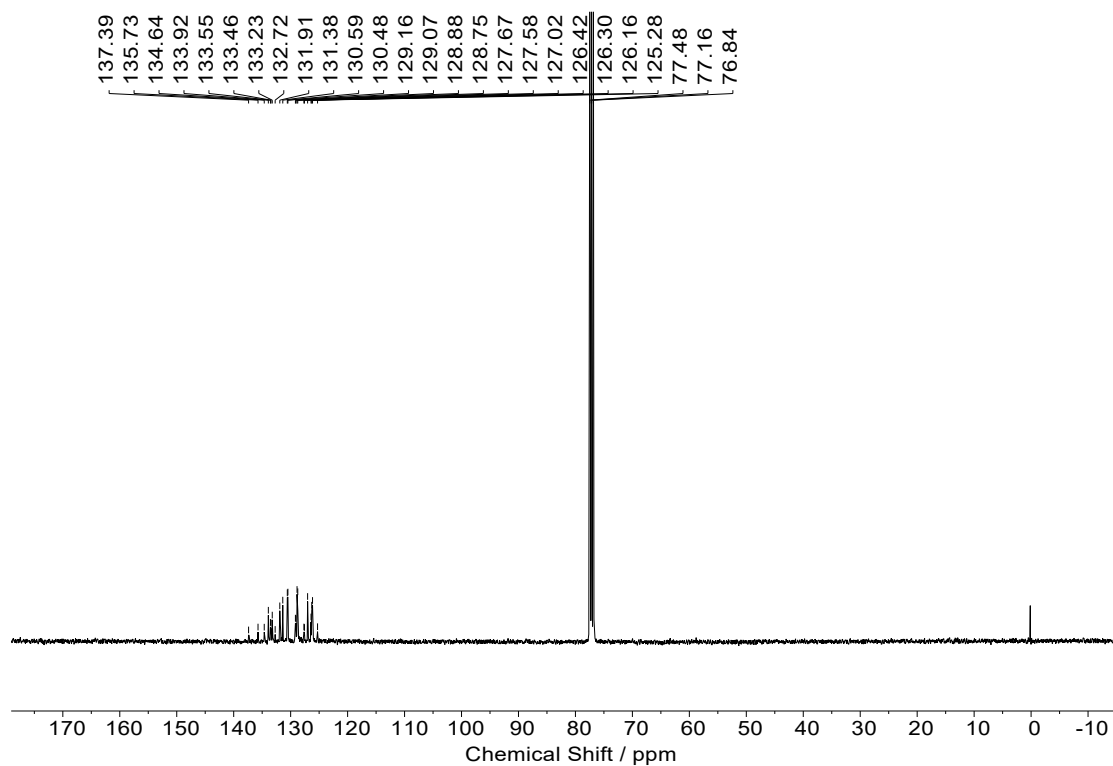

**Fig. S22.**  $^{13}\text{C}$  NMR spectrum of **5b** in  $\text{CDCl}_3$ .

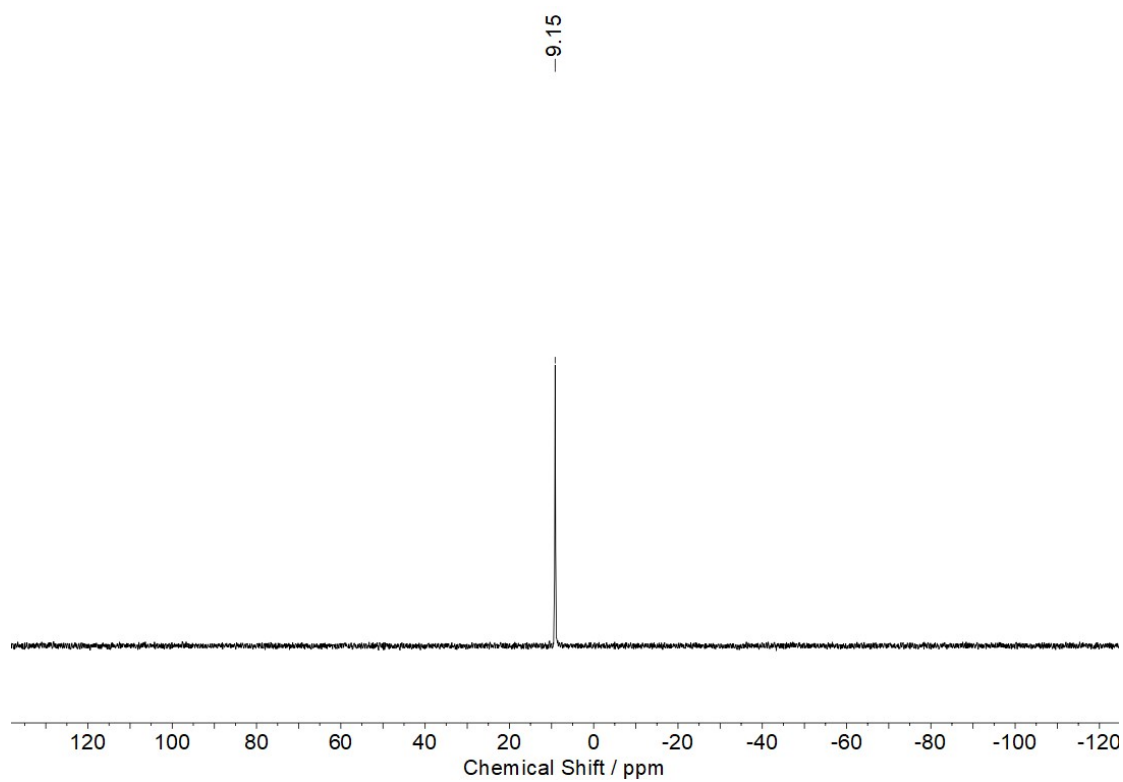

**Fig. S23.**  $^{31}\text{P}$  NMR spectrum of **5b** in  $\text{CDCl}_3$ .

## 7. Reference

1. Yuan, L.; Guo, J.; Yang, Y.; Ye, K.; Dou, C.; Wang, Y. A C<sub>54</sub>B<sub>2</sub> Polycyclic  $\pi$ -System with Bilayer Assembly and Multi-Redox Activity. *CCS Chem.* **2022**, DOI: 10.31635/ccschem.022.202201738.
2. Gaussian 09 (Revision A.02), Frisch, M. J.; Trucks, G. W.; Schlegel, H. B.; Scuseria, G.E.; Robb, M. A.; Cheeseman, J. R.; Scalmani, G.; Barone, V.; Mennucci, B.; Petersson, G. A.; Nakatsuji, H.; Caricato, M.; Li, X.; Hratchian, H. P.; Izmaylov, A. F.; Bloino, J.; Zheng, G.; Sonnenberg, J. L.; Hada, M.; Ehara, M.; Toyota, K.; Fukuda, R.; Hasegawa, J.; Ishida, M.; Nakajima, T.; Honda, Y.; Kitao, O.; Nakai, H.; Vreven, T.; Montgomery, Jr., J. A.; Peralta, J. E.; Ogliaro, F.; Bearpark, M.; Heyd, J. J.; Brothers, E.; Kudin, K. N.; Staroverov, V. N.; Kobayashi, R.; Normand, J.; Raghavachari, K.; Rendell, A.; Burant, J. C.; Iyengar, S. S.; Tomasi, J.; Cossi, M.; Rega, N.; Millam, J. M.; Klene, M.; Knox, J. E.; Cross, J. B.; Bakken, V.; Adamo, C.; Jaramillo, J.; Gomperts, R.; Stratmann, R. E.; Yazyev, O.; Austin, A. J.; Cammi, R.; Pomelli, C.; Ochterski, J. W.; Martin, R. L.; Morokuma, K.; Zakrzewski, V. G.; Voth, G. A.; Salvador, P.; Dannenberg, J. J.; Dapprich, S.; Daniels, A. D.; Farkas, Ö.; Foresman, J. B.; Ortiz, J. V.; Fox, D. J. Gaussian, Inc., Wallingford CT, **2009**.
